# Supplementary material for: Land Cover and Human Disturbance Impact on Water Chemistry and Ecological Health in an Asian Temperate Lotic System
Source: MDPI journal article supplement (doi:10.3390/land11091428), 2022-08-29
Supplement: s1 [file s1]

## Supplementary File

### Land Cover and Human Disturbance Impact on Water Chemistry and Ecological Health in an Asian Temperate Lotic System

Md Mamun, Jeong-Eun Kim and Kwang-Guk An\*

Table S1. Chemical health assessment based on multi-metric water pollution index (WPI) model in the Nakdong River basin.

| Domination   | Sites code | M1 Value | M2 value | M3 value | M4 value | M5 value | M6 value | M7 value | Overall WPI scores | Health Status |
|--------------|------------|----------|----------|----------|----------|----------|----------|----------|--------------------|---------------|
| Agricultural | 35.263569  | 5        | 5        | 5        | 5        | 5        | 5        | 5        | 35                 | Excellent     |
| Agricultural | 35.575686  | 5        | 5        | 5        | 5        | 5        | 5        | 5        | 35                 | Excellent     |
| Agricultural | 36.651139  | 3        | 5        | 5        | 3        | 5        | 5        | 5        | 31                 | Excellent     |
| Agricultural | 35.524861  | 3        | 3        | 5        | 3        | 3        | 5        | 5        | 27                 | Good          |
| Agricultural | 36.740097  | 1        | 3        | 5        | 3        | 5        | 1        | 5        | 23                 | Fair          |
| Agricultural | 36.516147  | 1        | 5        | 5        | 5        | 5        | 3        | 5        | 29                 | Good          |
| Agricultural | 36.962422  | 5        | 5        | 5        | 5        | 5        | 5        | 5        | 35                 | Excellent     |
| Agricultural | 35.432361  | 3        | 3        | 3        | 3        | 5        | 1        | 5        | 23                 | Fair          |
| Agricultural | 35.464461  | 5        | 5        | 5        | 5        | 3        | 5        | 5        | 33                 | Excellent     |
| Agricultural | 35.255275  | 3        | 5        | 5        | 3        | 5        | 5        | 5        | 31                 | Excellent     |
| Agricultural | 36.591133  | 3        | 5        | 5        | 5        | 5        | 3        | 5        | 31                 | Excellent     |
| Agricultural | 35.582408  | 3        | 3        | 5        | 5        | 5        | 1        | 3        | 25                 | Good          |
| Agricultural | 35.572036  | 3        | 3        | 5        | 3        | 1        | 5        | 3        | 23                 | Fair          |
| Agricultural | 36.056358  | 3        | 5        | 5        | 3        | 5        | 5        | 3        | 29                 | Good          |
| Agricultural | 36.536606  | 3        | 3        | 5        | 3        | 1        | 3        | 3        | 21                 | Fair          |
| Agricultural | 35.282344  | 3        | 5        | 5        | 3        | 3        | 5        | 3        | 27                 | Good          |
| Agricultural | 36.400094  | 3        | 5        | 5        | 3        | 5        | 3        | 3        | 27                 | Good          |
| Agricultural | 35.48985   | 3        | 3        | 5        | 3        | 3        | 5        | 3        | 25                 | Good          |
| Agricultural | 35.512556  | 3        | 3        | 5        | 3        | 3        | 5        | 3        | 25                 | Good          |
| Agricultural | 35.878086  | 5        | 5        | 5        | 3        | 5        | 5        | 3        | 31                 | Excellent     |
| Agricultural | 36.540714  | 1        | 5        | 5        | 3        | 3        | 1        | 3        | 21                 | Fair          |
| Agricultural | 36.116144  | 3        | 3        | 5        | 3        | 1        | 5        | 3        | 23                 | Fair          |

|              |           |   |   |   |   |   |   |   |    |      |
|--------------|-----------|---|---|---|---|---|---|---|----|------|
| Agricultural | 36.587222 | 1 | 3 | 5 | 5 | 1 | 3 | 3 | 21 | Fair |
| Agricultural | 35.811922 | 3 | 5 | 5 | 3 | 5 | 5 | 3 | 29 | Good |
| Agricultural | 36.186558 | 3 | 5 | 5 | 3 | 3 | 3 | 3 | 25 | Good |
| Agricultural | 36.225539 | 1 | 3 | 5 | 3 | 1 | 1 | 3 | 17 | Poor |
| Agricultural | 35.629269 | 3 | 3 | 5 | 3 | 3 | 5 | 3 | 25 | Good |
| Agricultural | 35.323817 | 3 | 3 | 5 | 3 | 3 | 1 | 3 | 21 | Fair |
| Agricultural | 35.702694 | 3 | 3 | 5 | 5 | 3 | 5 | 3 | 27 | Good |
| Agricultural | 35.616664 | 3 | 3 | 5 | 3 | 3 | 3 | 3 | 23 | Fair |
| Agricultural | 36.048853 | 3 | 3 | 5 | 3 | 5 | 3 | 3 | 25 | Good |
| Agricultural | 35.747306 | 3 | 3 | 3 | 5 | 3 | 3 | 3 | 23 | Fair |
| Agricultural | 36.375528 | 3 | 3 | 5 | 3 | 3 | 1 | 3 | 21 | Fair |
| Agricultural | 36.536753 | 3 | 5 | 5 | 3 | 3 | 1 | 3 | 23 | Fair |
| Agricultural | 36.552003 | 5 | 5 | 5 | 3 | 5 | 3 | 3 | 29 | Good |
| Agricultural | 36.551053 | 3 | 5 | 5 | 3 | 3 | 3 | 3 | 25 | Good |
| Agricultural | 36.548564 | 3 | 5 | 5 | 5 | 3 | 3 | 3 | 27 | Good |
| Agricultural | 35.676011 | 3 | 3 | 5 | 3 | 3 | 3 | 3 | 23 | Fair |
| Agricultural | 34.903544 | 3 | 3 | 3 | 3 | 1 | 1 | 3 | 17 | Poor |
| Agricultural | 36.562594 | 3 | 5 | 5 | 3 | 3 | 3 | 3 | 25 | Good |
| Agricultural | 35.560169 | 1 | 1 | 5 | 3 | 3 | 3 | 3 | 19 | Fair |
| Agricultural | 35.212633 | 3 | 3 | 5 | 3 | 3 | 5 | 3 | 25 | Good |
| Agricultural | 35.410797 | 3 | 3 | 5 | 3 | 1 | 3 | 3 | 21 | Fair |
| Agricultural | 36.434247 | 3 | 3 | 5 | 3 | 1 | 3 | 1 | 19 | Fair |
| Agricultural | 35.894183 | 1 | 3 | 5 | 3 | 3 | 1 | 1 | 17 | Poor |
| Agricultural | 36.354642 | 3 | 5 | 5 | 3 | 3 | 3 | 1 | 23 | Fair |
| Agricultural | 35.514722 | 3 | 3 | 5 | 3 | 1 | 3 | 1 | 19 | Fair |
| Agricultural | 36.405503 | 3 | 3 | 5 | 3 | 1 | 1 | 1 | 17 | Poor |
| Agricultural | 36.495861 | 3 | 5 | 5 | 3 | 3 | 3 | 1 | 23 | Fair |
| Agricultural | 35.313233 | 3 | 3 | 5 | 3 | 1 | 5 | 1 | 21 | Fair |
| Agricultural | 35.842731 | 3 | 3 | 5 | 3 | 3 | 3 | 1 | 21 | Fair |
| Agricultural | 36.400661 | 3 | 3 | 5 | 3 | 1 | 3 | 1 | 19 | Fair |
| Agricultural | 35.412017 | 3 | 3 | 5 | 3 | 3 | 3 | 1 | 21 | Fair |

|              |           |   |   |   |   |   |   |   |    |           |
|--------------|-----------|---|---|---|---|---|---|---|----|-----------|
| Agricultural | 36.018556 | 3 | 3 | 5 | 3 | 3 | 1 | 1 | 19 | Fair      |
| Agricultural | 35.410781 | 3 | 3 | 3 | 3 | 1 | 1 | 1 | 15 | Poor      |
| Agricultural | 35.525186 | 1 | 3 | 5 | 3 | 1 | 1 | 1 | 15 | Poor      |
| Agricultural | 35.380631 | 3 | 3 | 5 | 3 | 1 | 3 | 1 | 19 | Fair      |
| Agricultural | 35.611328 | 1 | 3 | 5 | 3 | 1 | 1 | 1 | 15 | Poor      |
| Agricultural | 35.439853 | 1 | 3 | 5 | 3 | 1 | 1 | 1 | 15 | Poor      |
| Agricultural | 35.459281 | 1 | 1 | 3 | 1 | 3 | 1 | 1 | 11 | Very poor |
| Agricultural | 35.839433 | 3 | 3 | 5 | 3 | 3 | 3 | 1 | 21 | Fair      |
| Agricultural | 35.622475 | 1 | 3 | 5 | 3 | 1 | 1 | 1 | 15 | Poor      |
| Agricultural | 35.380917 | 3 | 3 | 5 | 3 | 1 | 3 | 1 | 19 | Fair      |
| Agricultural | 35.808539 | 1 | 3 | 5 | 3 | 3 | 1 | 1 | 17 | Poor      |
| Agricultural | 35.390736 | 3 | 3 | 5 | 3 | 1 | 5 | 1 | 21 | Fair      |
| Agricultural | 35.750056 | 1 | 3 | 5 | 1 | 3 | 1 | 1 | 15 | Poor      |
| Agricultural | 35.978189 | 3 | 3 | 5 | 3 | 3 | 1 | 1 | 19 | Fair      |
| Agricultural | 35.192078 | 3 | 3 | 3 | 1 | 1 | 1 | 1 | 13 | Poor      |
| Agricultural | 35.853797 | 1 | 3 | 5 | 1 | 1 | 1 | 1 | 13 | Poor      |
| Agricultural | 35.519658 | 3 | 1 | 3 | 1 | 1 | 1 | 1 | 11 | Very poor |
| Barren       | 36.434525 | 3 | 5 | 5 | 3 | 3 | 3 | 1 | 23 | Fair      |
| Barren       | 36.069942 | 3 | 3 | 5 | 3 | 3 | 1 | 1 | 19 | Fair      |
| Barren       | 36.270139 | 3 | 5 | 5 | 3 | 3 | 3 | 1 | 23 | Fair      |
| Forest       | 35.506583 | 3 | 3 | 5 | 3 | 1 | 5 | 5 | 25 | Good      |
| Forest       | 35.760314 | 3 | 5 | 5 | 5 | 5 | 5 | 5 | 33 | Excellent |
| Forest       | 36.368606 | 3 | 5 | 5 | 5 | 5 | 3 | 5 | 31 | Excellent |
| Forest       | 35.615028 | 3 | 3 | 5 | 5 | 5 | 5 | 5 | 31 | Excellent |
| Forest       | 37.092472 | 3 | 5 | 5 | 5 | 5 | 1 | 5 | 29 | Good      |
| Forest       | 36.106278 | 3 | 3 | 5 | 5 | 3 | 5 | 5 | 29 | Good      |
| Forest       | 37.092361 | 3 | 5 | 5 | 5 | 5 | 1 | 5 | 29 | Good      |
| Forest       | 36.447883 | 3 | 5 | 5 | 5 | 5 | 3 | 5 | 31 | Excellent |
| Forest       | 35.577847 | 3 | 5 | 5 | 5 | 5 | 5 | 3 | 31 | Excellent |
| Forest       | 35.666278 | 3 | 3 | 5 | 5 | 5 | 5 | 3 | 29 | Good      |

|        |           |   |   |   |   |   |   |   |    |           |
|--------|-----------|---|---|---|---|---|---|---|----|-----------|
| Forest | 35.557403 | 3 | 5 | 5 | 3 | 3 | 5 | 3 | 27 | Good      |
| Forest | 36.955439 | 3 | 5 | 5 | 5 | 5 | 5 | 3 | 31 | Excellent |
| Forest | 35.563717 | 3 | 3 | 5 | 5 | 5 | 5 | 3 | 29 | Good      |
| Forest | 36.577472 | 3 | 5 | 5 | 5 | 5 | 3 | 3 | 29 | Good      |
| Forest | 36.043436 | 5 | 5 | 5 | 5 | 5 | 5 | 3 | 33 | Excellent |
| Forest | 36.778919 | 3 | 5 | 5 | 5 | 3 | 3 | 3 | 27 | Good      |
| Forest | 35.458717 | 5 | 5 | 5 | 3 | 5 | 5 | 3 | 31 | Excellent |
| Forest | 35.632558 | 3 | 3 | 5 | 3 | 3 | 5 | 3 | 25 | Good      |
| Forest | 36.549553 | 3 | 5 | 5 | 3 | 3 | 3 | 3 | 25 | Good      |
| Forest | 36.534367 | 3 | 5 | 5 | 3 | 3 | 3 | 3 | 25 | Good      |
| Forest | 36.715969 | 3 | 3 | 5 | 3 | 1 | 3 | 1 | 19 | Fair      |
| Urban  | 35.022475 | 3 | 3 | 5 | 3 | 3 | 5 | 5 | 27 | Good      |
| Urban  | 35.388033 | 3 | 5 | 5 | 5 | 3 | 5 | 5 | 31 | Excellent |
| Urban  | 35.232711 | 3 | 3 | 3 | 1 | 3 | 1 | 3 | 17 | Poor      |
| Urban  | 35.471011 | 3 | 3 | 5 | 3 | 3 | 5 | 3 | 25 | Good      |
| Urban  | 35.685481 | 3 | 3 | 5 | 3 | 3 | 5 | 3 | 25 | Good      |
| Urban  | 35.993519 | 3 | 3 | 3 | 3 | 5 | 1 | 3 | 21 | Fair      |
| Urban  | 35.551653 | 3 | 3 | 5 | 5 | 3 | 1 | 3 | 23 | Fair      |
| Urban  | 35.54925  | 3 | 3 | 3 | 3 | 1 | 1 | 3 | 17 | Poor      |
| Urban  | 35.999325 | 3 | 3 | 3 | 3 | 1 | 1 | 1 | 15 | Poor      |
| Urban  | 35.315297 | 3 | 3 | 5 | 3 | 1 | 3 | 1 | 19 | Fair      |
| Urban  | 35.7051   | 1 | 3 | 5 | 3 | 3 | 1 | 1 | 17 | Poor      |
| Urban  | 35.380864 | 3 | 3 | 5 | 3 | 1 | 3 | 1 | 19 | Fair      |

Table S2. Biological health assessment based on the multi-metric index of biotic integrity (IBI) model in the Nakdong River basin.

| Domination   | Sites code | M1 Value | M2 value | M3 value | M4 value | M5 value | M6 value | M7 value | M8 value | Overall IBI score | Health status |
|--------------|------------|----------|----------|----------|----------|----------|----------|----------|----------|-------------------|---------------|
| Agricultural | 35.102361  | 3        | 3        | 3        | 3        | 5        | 5        | 3        | 3        | 28                | Good          |
| Agricultural | 35.192139  | 1        | 1        | 1        | 1        | 5        | 1        | 1        | 3        | 14                | Poor          |
| Agricultural | 35.212639  | 1        | 1        | 1        | 1        | 3        | 5        | 1        | 3        | 16                | Poor          |
| Agricultural | 35.255361  | 5        | 1        | 1        | 1        | 1        | 5        | 3        | 3        | 20                | Fair          |
| Agricultural | 35.263333  | 3        | 1        | 3        | 3        | 3        | 5        | 3        | 3        | 24                |               |
| Agricultural | 35.277861  | 1        | 1        | 1        | 1        | 1        | 3        | 1        | 3        | 12                |               |
| Agricultural | 35.282083  | 1        | 1        | 1        | 1        | 5        | 5        | 1        | 3        | 18                |               |
| Agricultural | 35.311111  | 1        | 1        | 1        | 1        | 5        | 3        | 1        | 3        | 16                | Poor          |
| Agricultural | 35.32375   | 3        | 1        | 1        | 1        | 1        | 3        | 3        | 3        | 16                | Poor          |
| Agricultural | 35.379722  | 1        | 1        | 1        | 1        | 3        | 5        | 1        | 3        | 16                | Poor          |
| Agricultural | 35.382083  | 1        | 1        | 1        | 1        | 5        | 1        | 1        | 3        | 14                | Poor          |
| Agricultural | 35.387222  | 1        | 1        | 1        | 1        | 5        | 5        | 1        | 3        | 18                |               |
| Agricultural | 35.410694  | 3        | 1        | 1        | 1        | 1        | 3        | 3        | 3        | 16                | Poor          |
| Agricultural | 35.410778  | 1        | 1        | 1        | 1        | 5        | 1        | 1        | 3        | 14                | Poor          |
| Agricultural | 35.411722  | 1        | 1        | 1        | 1        | 5        | 5        | 1        | 3        | 18                |               |
| Agricultural | 35.434917  | 1        | 1        | 1        | 1        | 1        | 1        | 1        | 3        | 10                | Very poor     |
| Agricultural | 35.439917  | 1        | 1        | 1        | 1        | 5        | 3        | 1        | 3        | 16                | Poor          |
| Agricultural | 35.462139  | 1        | 1        | 1        | 1        | 1        | 1        | 1        | 3        | 10                | Very poor     |
| Agricultural | 35.464583  | 5        | 3        | 3        | 3        | 3        | 5        | 3        | 3        | 28                | Good          |
| Agricultural | 35.490361  | 3        | 1        | 1        | 3        | 3        | 5        | 1        | 3        | 20                | Fair          |
| Agricultural | 35.51475   | 1        | 1        | 1        | 1        | 3        | 3        | 1        | 3        | 14                | Poor          |
| Agricultural | 35.517944  | 1        | 1        | 1        | 1        | 1        | 3        | 1        | 3        | 12                |               |
| Agricultural | 35.519583  | 1        | 1        | 1        | 1        | 1        | 1        | 1        | 3        | 10                | Very poor     |
| Agricultural | 35.529056  | 1        | 1        | 1        | 1        | 5        | 5        | 1        | 3        | 18                |               |
| Agricultural | 35.560167  | 1        | 1        | 1        | 1        | 1        | 1        | 1        | 3        | 10                | Very poor     |
| Agricultural | 35.571639  | 1        | 1        | 1        | 1        | 3        | 5        | 1        | 3        | 16                | Poor          |
| Agricultural | 35.577417  | 1        | 1        | 3        | 5        | 5        | 5        | 1        | 3        | 24                |               |
| Agricultural | 35.585333  | 1        | 1        | 1        | 1        | 1        | 1        | 1        | 3        | 10                | Very poor     |
| Agricultural | 35.611     | 1        | 1        | 1        | 1        | 3        | 5        | 1        | 3        | 16                | Poor          |
| Agricultural | 35.615472  | 1        | 1        | 1        | 1        | 3        | 3        | 1        | 3        | 14                | Poor          |
| Agricultural | 35.622472  | 1        | 1        | 1        | 1        | 5        | 1        | 1        | 3        | 14                | Poor          |
| Agricultural | 35.679111  | 3        | 1        | 1        | 1        | 1        | 1        | 1        | 3        | 12                |               |
| Agricultural | 35.684222  | 5        | 3        | 3        | 1        | 1        | 5        | 3        | 3        | 24                |               |
| Agricultural | 35.697     | 5        | 1        | 3        | 3        | 5        | 5        | 5        | 3        | 30                |               |
| Agricultural | 35.708056  | 1        | 1        | 1        | 1        | 1        | 1        | 1        | 3        | 10                | Very poor     |

|              |           |   |   |   |   |   |   |   |   |    |           |
|--------------|-----------|---|---|---|---|---|---|---|---|----|-----------|
| Agricultural | 35.750333 | 3 | 1 | 1 | 3 | 3 | 5 | 3 | 3 | 22 | Fair      |
| Agricultural | 35.753    | 1 | 1 | 1 | 1 | 5 | 3 | 1 | 3 | 16 | Poor      |
| Agricultural | 35.814972 | 1 | 1 | 1 | 1 | 5 | 1 | 1 | 3 | 14 | Poor      |
| Agricultural | 35.8175   | 1 | 1 | 1 | 1 | 3 | 3 | 1 | 3 | 14 | Poor      |
| Agricultural | 35.88125  | 3 | 3 | 3 | 5 | 5 | 5 | 1 | 3 | 28 | Good      |
| Agricultural | 35.897444 | 1 | 1 | 1 | 1 | 1 | 1 | 1 | 3 | 10 | Very poor |
| Agricultural | 35.981361 | 1 | 1 | 1 | 1 | 5 | 1 | 1 | 3 | 14 | Poor      |
| Agricultural | 36.022778 | 1 | 1 | 1 | 1 | 5 | 5 | 1 | 3 | 18 |           |
| Agricultural | 36.046083 | 3 | 1 | 1 | 3 | 5 | 5 | 1 | 3 | 22 | Fair      |
| Agricultural | 36.051778 | 3 | 1 | 1 | 1 | 3 | 5 | 3 | 3 | 20 | Fair      |
| Agricultural | 36.056556 | 3 | 1 | 3 | 3 | 5 | 5 | 1 | 3 | 24 |           |
| Agricultural | 36.189722 | 3 | 1 | 1 | 1 | 1 | 3 | 1 | 3 | 14 | Poor      |
| Agricultural | 36.225111 | 1 | 1 | 1 | 1 | 3 | 1 | 1 | 3 | 12 |           |
| Agricultural | 36.354722 | 1 | 1 | 1 | 1 | 3 | 3 | 1 | 3 | 14 | Poor      |
| Agricultural | 36.378278 | 1 | 1 | 1 | 1 | 1 | 3 | 1 | 3 | 12 |           |
| Agricultural | 36.403    | 1 | 1 | 1 | 3 | 1 | 3 | 1 | 3 | 14 | Poor      |
| Agricultural | 36.4055   | 1 | 1 | 1 | 1 | 5 | 1 | 1 | 3 | 14 | Poor      |
| Agricultural | 36.433333 | 1 | 1 | 1 | 1 | 3 | 3 | 1 | 3 | 14 | Poor      |
| Agricultural | 36.434444 | 1 | 1 | 1 | 1 | 1 | 3 | 1 | 3 | 12 |           |
| Agricultural | 36.516147 | 3 | 1 | 1 | 1 | 5 | 5 | 1 | 3 | 20 | Fair      |
| Agricultural | 36.528917 | 1 | 1 | 1 | 1 | 1 | 3 | 1 | 3 | 12 |           |
| Agricultural | 36.536556 | 3 | 1 | 1 | 1 | 1 | 1 | 1 | 3 | 12 |           |
| Agricultural | 36.540694 | 3 | 1 | 1 | 1 | 3 | 5 | 1 | 3 | 18 |           |
| Agricultural | 36.550889 | 1 | 1 | 1 | 1 | 1 | 1 | 1 | 3 | 10 | Very poor |
| Agricultural | 36.551989 | 3 | 1 | 1 | 1 | 1 | 3 | 3 | 3 | 16 | Poor      |
| Agricultural | 36.555528 | 3 | 1 | 1 | 1 | 1 | 1 | 1 | 3 | 12 |           |
| Agricultural | 36.587028 | 1 | 1 | 1 | 1 | 1 | 3 | 1 | 3 | 12 |           |
| Agricultural | 36.591028 | 3 | 1 | 1 | 3 | 3 | 5 | 3 | 3 | 22 | Fair      |
| Agricultural | 36.650036 | 5 | 3 | 5 | 1 | 3 | 5 | 5 | 3 | 30 |           |
| Agricultural | 36.719444 | 3 | 1 | 1 | 1 | 1 | 1 | 3 | 3 | 14 | Poor      |
| Agricultural | 36.742942 | 3 | 1 | 1 | 1 | 1 | 1 | 5 | 3 | 16 | Poor      |
| Agricultural | 36.964139 | 3 | 1 | 1 | 1 | 1 | 3 | 5 | 3 | 18 |           |
| Barren       | 36.07     | 1 | 1 | 1 | 1 | 5 | 5 | 1 | 3 | 18 |           |
| Barren       | 36.273111 | 1 | 1 | 1 | 1 | 3 | 3 | 1 | 3 | 14 | Poor      |
| Barren       | 36.40425  | 1 | 1 | 1 | 1 | 3 | 1 | 1 | 3 | 12 |           |
| Barren       | 36.498472 | 1 | 1 | 1 | 1 | 3 | 1 | 1 | 3 | 12 |           |
| Forest       | 35.315417 | 1 | 1 | 1 | 1 | 5 | 5 | 1 | 5 | 20 | Fair      |
| Forest       | 35.465722 | 3 | 3 | 5 | 3 | 5 | 5 | 3 | 5 | 32 | Excellent |
| Forest       | 35.471    | 1 | 1 | 1 | 1 | 1 | 1 | 1 | 5 | 12 |           |
| Forest       | 35.5065   | 3 | 1 | 1 | 1 | 3 | 5 | 5 | 5 | 24 |           |
| Forest       | 35.526944 | 1 | 1 | 1 | 1 | 5 | 1 | 1 | 5 | 16 | Poor      |
| Forest       | 35.555083 | 1 | 1 | 1 | 1 | 1 | 1 | 1 | 5 | 12 |           |
| Forest       | 35.563806 | 1 | 1 | 1 | 1 | 5 | 1 | 1 | 5 | 16 | Poor      |

|        |           |   |   |   |   |   |   |   |   |    |           |
|--------|-----------|---|---|---|---|---|---|---|---|----|-----------|
| Forest | 35.577278 | 3 | 1 | 3 | 1 | 5 | 5 | 1 | 5 | 24 |           |
| Forest | 35.608833 | 1 | 1 | 1 | 5 | 5 | 5 | 1 | 5 | 24 |           |
| Forest | 35.632028 | 3 | 1 | 1 | 1 | 1 | 3 | 1 | 5 | 16 | Poor      |
| Forest | 35.66625  | 3 | 3 | 3 | 5 | 5 | 5 | 3 | 5 | 32 | Excellent |
| Forest | 35.760194 | 3 | 1 | 3 | 3 | 5 | 5 | 1 | 5 | 26 | Good      |
| Forest | 35.842167 | 1 | 1 | 1 | 1 | 5 | 5 | 1 | 5 | 20 | Fair      |
| Forest | 35.861694 | 1 | 1 | 1 | 1 | 1 | 3 | 1 | 5 | 14 | Poor      |
| Forest | 36.107778 | 1 | 1 | 1 | 5 | 5 | 5 | 1 | 5 | 24 |           |
| Forest | 36.368547 | 3 | 1 | 3 | 5 | 5 | 5 | 3 | 5 | 30 |           |
| Forest | 36.447306 | 1 | 1 | 1 | 1 | 1 | 3 | 1 | 5 | 14 | Poor      |
| Forest | 36.537111 | 1 | 1 | 1 | 1 | 3 | 1 | 1 | 5 | 14 | Poor      |
| Forest | 36.549553 | 1 | 1 | 1 | 1 | 3 | 3 | 1 | 5 | 16 | Poor      |
| Forest | 36.564889 | 1 | 1 | 1 | 1 | 1 | 5 | 1 | 5 | 16 | Poor      |
| Forest | 36.577472 | 1 | 1 | 1 | 1 | 1 | 3 | 1 | 5 | 14 | Poor      |
| Forest | 36.778611 | 3 | 1 | 1 | 3 | 3 | 5 | 3 | 5 | 24 |           |
| Forest | 36.952511 | 3 | 3 | 5 | 5 | 5 | 5 | 5 | 5 | 36 | Excellent |
| Forest | 37.093806 | 1 | 1 | 3 | 5 | 5 | 5 | 5 | 5 | 30 |           |
| Forest | 37.09425  | 3 | 3 | 3 | 5 | 5 | 5 | 3 | 5 | 32 | Excellent |
| Urban  | 34.903278 | 3 | 1 | 1 | 1 | 5 | 5 | 3 | 3 | 22 | Fair      |
| Urban  | 35.0225   | 5 | 1 | 1 | 1 | 1 | 3 | 3 | 3 | 18 |           |
| Urban  | 35.234028 | 5 | 1 | 1 | 1 | 1 | 1 | 5 | 3 | 18 |           |
| Urban  | 35.381056 | 1 | 1 | 1 | 1 | 3 | 1 | 1 | 3 | 12 |           |
| Urban  | 35.388056 | 3 | 1 | 1 | 1 | 3 | 5 | 3 | 3 | 20 | Fair      |
| Urban  | 35.514861 | 5 | 1 | 3 | 5 | 5 | 5 | 3 | 3 | 30 |           |
| Urban  | 35.549278 | 1 | 1 | 1 | 1 | 3 | 1 | 1 | 3 | 12 |           |
| Urban  | 35.553806 | 1 | 1 | 1 | 1 | 3 | 1 | 1 | 3 | 12 |           |
| Urban  | 35.993528 | 3 | 3 | 1 | 3 | 3 | 3 | 3 | 3 | 22 | Fair      |
| Urban  | 36.001083 | 1 | 1 | 1 | 1 | 5 | 5 | 1 | 3 | 18 |           |
| Urban  | 36.118889 | 1 | 1 | 1 | 1 | 1 | 1 | 1 | 3 | 10 | Very poor |
